# Supplementary material for: The Potential Elimination of Plasmodium vivax Malaria by Relapse Treatment: Insights from a Transmission Model and Surveillance Data from NW India
Source: PLOS journal article supplement (doi:10.1371/journal.pntd.0001979), 2013-01-10

Fig.S2

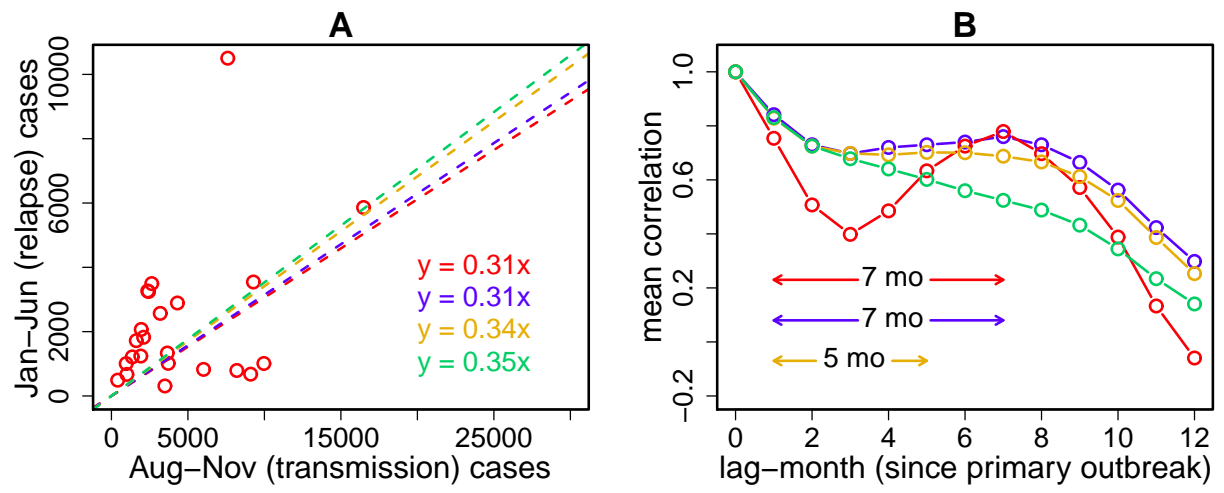

Supplement: S3 (10.1371/journal.pntd.0001979.s003) [file journal.pntd.0001979.s003]
